# Supplementary material for: Treatment Pattern and Outcomes with Systemic Therapy in Men with Metastatic Prostate Cancer in the Real-World Patients in the United States
Source: MDPI journal article supplement (doi:10.3390/cancers13194951), 2021-09-30

## Supplementary Materials

**Supplementary Table 1.** Patient characteristics among all patients with evidence of contact within 180 days of metastatic prostate cancer diagnosis and with information on treatment in the metastatic setting.

| Characteristic                                                      | N (%)              |
|---------------------------------------------------------------------|--------------------|
| N                                                                   | 9747               |
| Race / Ethnicity                                                    |                    |
| White (Non-Hispanic)                                                | 6242 (64%)         |
| Black (Non-Hispanic)                                                | 881 (9%)           |
| Asian (Non-Hispanic)                                                | 129 (1.3%)         |
| Hispanic / Latino                                                   | 626 (6.4%)         |
| Other                                                               | 1032 (10.6%)       |
| Missing                                                             | 837 (8.6%)         |
| Gleason Score at Initial Diagnosis                                  |                    |
| Less than or equal to 6                                             | 617 (6.3%)         |
| 3 + 4 = 7                                                           | 656 (6.7%)         |
| 7 (when breakdown not available)                                    | 226 (2.3%)         |
| 4 + 3 = 7                                                           | 828 (8.5%)         |
| 8                                                                   | 1497 (15.4%)       |
| 9                                                                   | 2441 (25%)         |
| 10                                                                  | 592 (6.1%)         |
| Missing                                                             | 2890 (29.7%)       |
| PSA at Diagnosis of Metastasis - Median [Q1, Q3]                    | 49.8 [12.5, 218.2] |
| Age at First Treatment After Metastatic Diagnosis - Median [Q1, Q3] | 74.2 [66.6, 79.9]  |
| Year of First Treatment After Metastatic Diagnosis*                 |                    |
| 2011                                                                | 1 (0%)             |
| 2012                                                                | 15 (0.2%)          |
| 2013                                                                | 1105 (11.3%)       |
| 2014                                                                | 1416 (14.5%)       |
| 2015                                                                | 1516 (15.6%)       |
| 2016                                                                | 1610 (16.5%)       |
| 2017                                                                | 1506 (15.5%)       |
| 2018                                                                | 1514 (15.5%)       |
| 2019                                                                | 1064 (10.9%)       |

\* In some cases, a treatment was given continuously both before and after metastatic diagnosis, in which case the start date reflects the true start date of the treatment, which may be prior to metastasis.

**Supplementary Table 2.** Patient Characteristics Among 2L Alternate NHT vs. 2L Docetaxel, separately by 1L Abiraterone and 1L Enzalutamide. Continuous variables are compared with the Wilcoxon rank-sum test, and categorical variables are compared with the chi-squared test. Columns display the p-values for these tests using both the original data and the propensity score (PS)-weighted data, as well as the standardized mean difference (SMD) using both the original data and the PS-weighted data. PS-weighted p-values below 0.05 and PS-weighted SMDs above 0.20 (a typical threshold used to identify lack of balance in treatment arms) are bold-faced. More details of evaluation of balance in treatment arms after PS-weighting is presented below.

| Variable                                                                                     | 1L Abiraterone       |                      |                   |                    |                     |                      | 1L Enzalutamide      |                      |                   |                    |                     |                      |
|----------------------------------------------------------------------------------------------|----------------------|----------------------|-------------------|--------------------|---------------------|----------------------|----------------------|----------------------|-------------------|--------------------|---------------------|----------------------|
|                                                                                              | 2L Enzalutamide      | 2L Docetaxel         | p<br>(unweighted) | p<br>(PS-weighted) | SMD<br>(unweighted) | SMD<br>(PS-weighted) | 2L Abiraterone       | 2L Docetaxel         | p<br>(unweighted) | p<br>(PS-weighted) | SMD<br>(unweighted) | SMD<br>(PS-weighted) |
| N                                                                                            | 508                  | 187                  |                   |                    |                     |                      | 290                  | 132                  |                   |                    |                     |                      |
| Follow-Up time<br>(Months; Median [Q1, Q3])                                                  | 10.2 [5.3, 17.2]     |                      |                   |                    |                     |                      | 9.2 [4.9, 15.2]      |                      |                   |                    |                     |                      |
| Follow-Up time Among Patients Alive<br>Who Did Not Die On-Study<br>(Months; Median [Q1, Q3]) | 13.6 [8.1, 19.4]     |                      |                   |                    |                     |                      | 10.5 [6.4, 17.6]     |                      |                   |                    |                     |                      |
| Age at 2L Start<br>(Years; Median [Q1, Q3])                                                  | 77.9 [70.9, 81.3]    | 74.2 [67.0, 79.2]    | <0.001            | <b>0.032</b>       | 0.394               | 0.192                | 79.9 [71.9, 82.2]    | 73.4 [69.2, 79.7]    | <0.001            | 0.058              | 0.408               | 0.166                |
| Time On 1L Therapy<br>(Months; Median [Q1, Q3])                                              | 7.7 [4.6, 13.1]      | 5.1 [3.0, 8.3]       | <0.001            | <b>0.028</b>       | 0.466               | 0.168                | 8.9 [5.3, 15.4]      | 5.5 [3.3, 10.9]      | <0.001            | 0.072              | 0.387               | 0.168                |
| Hormone Sensitive in 1L                                                                      | 4.3%                 | 3.7%                 | 0.897             | 0.690              | 0.030               | 0.036                | 3.8%                 | 2.3%                 | 0.606             | 0.416              | 0.089               | 0.093                |
| Year at 2L Start                                                                             |                      |                      |                   |                    |                     |                      |                      |                      |                   |                    |                     |                      |
| 2013                                                                                         | 8 (1.6%)             | 11 (5.9%)            | 0.013             | 0.637              | 0.228               | 0.115                | 2 (0.7%)             | 3 (2.3%)             | 0.098             | 0.589              | 0.131               | 0.064                |
| 2014                                                                                         | 65 (12.8%)           | 29 (15.5%)           |                   |                    | 0.078               | 0.015                | 9 (3.1%)             | 4 (3.0%)             |                   |                    | 0.004               | 0.060                |
| 2015                                                                                         | 98 (19.3%)           | 30 (16.0%)           |                   |                    | 0.085               | 0.036                | 37 (12.8%)           | 20 (15.2%)           |                   |                    | 0.069               | 0.039                |
| 2016                                                                                         | 112 (22.0%)          | 29 (15.5%)           |                   |                    | 0.168               | 0.108                | 78 (26.9%)           | 21 (15.9%)           |                   |                    | 0.270               | 0.173                |
| 2017                                                                                         | 88 (17.3%)           | 28 (15.0%)           |                   |                    | 0.064               | 0.030                | 64 (22.1%)           | 30 (22.7%)           |                   |                    | 0.016               | <0.001               |
| 2018                                                                                         | 120 (23.6%)          | 50 (26.7%)           |                   |                    | 0.072               | 0.063                | 80 (27.6%)           | 37 (28.0%)           |                   |                    | 0.010               | 0.025                |
| 2019                                                                                         | 17 (3.3%)            | 10 (5.3%)            |                   |                    | 0.098               | 0.095                | 20 (6.9%)            | 17 (12.9%)           |                   |                    | 0.201               | 0.153                |
| ECOG Prior to 2L Start                                                                       |                      |                      |                   |                    |                     |                      |                      |                      |                   |                    |                     |                      |
| 0                                                                                            | 88 (17.3%)           | 36 (19.3%)           | 0.593             | 0.310              | 0.050               | 0.066                | 58 (20.0%)           | 27 (20.5%)           | 0.107             | <b>0.039</b>       | 0.011               | 0.023                |
| 1                                                                                            | 151 (29.7%)          | 59 (31.6%)           |                   |                    | 0.040               | 0.084                | 103 (35.5%)          | 45 (34.1%)           |                   |                    | 0.030               | 0.017                |
| 2                                                                                            | 67 (13.2%)           | 18 (9.6%)            |                   |                    | 0.112               | 0.157                | 29 (10.0%)           | 21 (15.9%)           |                   |                    | 0.176               | 0.173                |
| 3-4                                                                                          | 17 (3.3%)            | 7 (3.7%)             |                   |                    | 0.021               | 0.015                | 16 (5.5%)            | 2 (1.5%)             |                   |                    | 0.218               | <b>0.292</b>         |
| Missing                                                                                      | 185 (36.4%)          | 67 (35.8%)           |                   |                    | 0.012               | 0.031                | 84 (29.0%)           | 37 (28.0%)           |                   |                    | 0.021               | 0.002                |
| Race / Ethnicity                                                                             |                      |                      |                   |                    |                     |                      |                      |                      |                   |                    |                     |                      |
| White (Non-Hispanic)                                                                         | 335 (65.9%)          | 127 (67.9%)          | 0.779             | 0.562              | 0.042               | 0.091                | 191 (65.9%)          | 97 (73.5%)           | 0.361             | 0.589              | 0.166               | 0.133                |
| Black (Non-Hispanic)                                                                         | 52 (10.2%)           | 19 (10.2%)           |                   |                    | 0.002               | 0.064                | 33 (11.4%)           | 13 (9.8%)            |                   |                    | 0.050               | 0.089                |
| Asian (Non-Hispanic)                                                                         | 8 (1.6%)             | 1 (0.5%)             |                   |                    | 0.102               | 0.111                | 3 (1.0%)             | 2 (1.5%)             |                   |                    | 0.043               | 0.096                |
| Hispanic / Latino                                                                            | 41 (8.1%)            | 12 (6.4%)            |                   |                    | 0.064               | 0.077                | 13 (4.5%)            | 6 (4.5%)             |                   |                    | 0.003               | 0.003                |
| Other                                                                                        | 46 (9.1%)            | 18 (9.6%)            |                   |                    | 0.020               | 0.043                | 35 (12.1%)           | 8 (6.1%)             |                   |                    | 0.210               | 0.107                |
| Missing                                                                                      | 26 (5.1%)            | 10 (5.3%)            |                   |                    | 0.010               | 0.015                | 15 (5.2%)            | 6 (4.5%)             |                   |                    | 0.029               | 0.059                |
| Gleason At Initial Diagnosis                                                                 |                      |                      |                   |                    |                     |                      |                      |                      |                   |                    |                     |                      |
| Less than or equal to 6                                                                      | 38 (7.5%)            | 14 (7.5%)            | 0.271             | 0.594              | <0.001              | 0.020                | 24 (8.3%)            | 10 (7.6%)            | 0.817             | 0.977              | 0.026               | 0.040                |
| 3 + 4 = 7                                                                                    | 35 (6.9%)            | 12 (6.4%)            |                   |                    | 0.019               | 0.010                | 17 (5.9%)            | 10 (7.6%)            |                   |                    | 0.068               | 0.063                |
| 7 (when breakdown not available)                                                             | 24 (4.7%)            | 6 (3.2%)             |                   |                    | 0.078               | 0.035                | 10 (3.4%)            | 5 (3.8%)             |                   |                    | 0.018               | 0.038                |
| 4 + 3 = 7                                                                                    | 36 (7.1%)            | 22 (11.8%)           |                   |                    | 0.160               | 0.142                | 18 (6.2%)            | 11 (8.3%)            |                   |                    | 0.082               | 0.058                |
| 8                                                                                            | 89 (17.5%)           | 25 (13.4%)           |                   |                    | 0.115               | 0.084                | 45 (15.5%)           | 17 (12.9%)           |                   |                    | 0.075               | 0.076                |
| 9                                                                                            | 114 (22.4%)          | 50 (26.7%)           |                   |                    | 0.100               | 0.038                | 73 (25.2%)           | 41 (31.1%)           |                   |                    | 0.131               | 0.042                |
| 10                                                                                           | 34 (6.7%)            | 9 (4.8%)             |                   |                    | 0.081               | 0.111                | 13 (4.5%)            | 10 (7.6%)            |                   |                    | 0.130               | 0.050                |
| Missing                                                                                      | 138 (27.2%)          | 49 (26.2%)           |                   |                    | 0.022               | 0.017                | 90 (31.0%)           | 28 (21.2%)           |                   |                    | 0.224               | 0.125                |
| PSA at Diagnosis of Metastasis                                                               | 46.0 [13.9, 150.0]   | 53.6 [13.6, 239.0]   | 0.455             | 0.447              | 0.060               | 0.046                | 48.8 [12.8, 165.8]   | 50.4 [9.3, 238.1]    | 0.887             | 0.332              | 0.034               | 0.102                |
| Missing (%)                                                                                  | 11.2%                | 7.5%                 | 0.194             | 0.199              |                     |                      | 11.7%                | 13.6%                | 0.693             | 0.981              |                     |                      |
| PSA at within 3 Months Prior to 1L Start                                                     | 28.6 [10.6, 86.2]    | 48.3 [14.0, 102.6]   | 0.033             | 0.870              | 0.112               | 0.109                | 25.2 [8.5, 85.4]     | 46.2 [21.9, 137.7]   | 0.002             | 0.198              | 0.098               | 0.010                |
| Missing (%)                                                                                  | 37.8%                | 35.8%                | 0.699             | 0.994              |                     |                      | 36.6%                | 43.2%                | 0.234             | 0.468              |                     |                      |
| Biomarkers within 3 Months Prior to 2L Start                                                 |                      |                      |                   |                    |                     |                      |                      |                      |                   |                    |                     |                      |
| PSA                                                                                          | 32.7 [9.0, 103.3]    | 74.3 [25.3, 266.9]   | <0.001            | 0.108              | 0.107               | 0.105                | 24.8 [8.6, 74.7]     | 66.9 [19.3, 187.0]   | <0.001            | 0.064              | 0.354               | 0.166                |
| Missing (%)                                                                                  | 19.3%                | 12.3%                | 0.041             | 0.466              |                     |                      | 22.1%                | 21.2%                | 0.944             | 0.765              |                     |                      |
| LDH                                                                                          | 207.0 [170.0, 269.0] | 265.0 [201.0, 335.5] | 0.016             | 0.478              | 0.124               | 0.056                | 205.0 [180.0, 290.0] | 201.0 [173.0, 467.5] | 0.570             | 0.777              | 0.083               | 0.017                |
| Missing (%)                                                                                  | 83.7%                | 83.4%                | 1.000             | 0.717              |                     |                      | 83.1%                | 82.6%                | 1.000             | 0.977              |                     |                      |
| Alkaline Phosphatase                                                                         | 90.0 [65.0, 150.5]   | 168.0 [83.5, 340.5]  | <0.001            | 0.058              | 0.281               | 0.011                | 86.0 [67.0, 123.0]   | 103.0 [77.0, 162.0]  | 0.001             | 0.258              | 0.200               | 0.018                |
| Missing (%)                                                                                  | 16.7%                | 8.6%                 | 0.010             | 0.470              |                     |                      | 14.5%                | 11.4%                | 0.474             | 0.923              |                     |                      |
| Hemoglobin                                                                                   | 12.2 [11.1, 13.1]    | 11.6 [10.4, 13.1]    | 0.010             | 0.668              | 0.202               | 0.025                | 12.2 [11.1, 13.3]    | 11.9 [10.6, 13.2]    | 0.136             | 0.635              | 0.260               | 0.144                |
| Missing (%)                                                                                  | 14.8%                | 8.0%                 | 0.026             | 0.753              |                     |                      | 16.2%                | 7.6%                 | 0.024             | 0.186              |                     |                      |
| Total Number if Diagnosis Codes                                                              | 6.0 [4.0, 11.0]      | 7.0 [5.0, 12.0]      | 0.006             | 0.140              | 0.145               | 0.092                | 7.0 [3.0, 11.8]      | 8.0 [5.0, 14.0]      | 0.029             | 0.171              | 0.002               | 0.034                |
| Diagnoses Noted in Medical Records Prior to 2L Start                                         |                      |                      |                   |                    |                     |                      |                      |                      |                   |                    |                     |                      |
| Any Specific Mets Noted                                                                      | 71.5%                | 77.5%                | 0.132             | 0.290              | 0.140               | 0.096                | 70.3%                | 74.2%                | 0.480             | 0.570              | 0.087               | 0.063                |
| Visceral Mets                                                                                | 1.6%                 | 3.7%                 | 0.147             | 0.318              | 0.135               | 0.092                | 0.3%                 | 2.3%                 | 0.176             | 0.375              | 0.170               | 0.110                |

|                                                       |       |       |       |       |       |       |       |       |       |       |       |       |
|-------------------------------------------------------|-------|-------|-------|-------|-------|-------|-------|-------|-------|-------|-------|-------|
| Diabetes                                              | 9.8%  | 7.5%  | 0.421 | 0.191 | 0.084 | 0.125 | 12.8% | 8.3%  | 0.245 | 0.252 | 0.144 | 0.130 |
| Heart Failure                                         | 2.0%  | 1.1%  | 0.632 | 0.289 | 0.073 | 0.104 | 1.7%  | 0.8%  | 0.738 | 0.522 | 0.087 | 0.076 |
| Neuropathy                                            | 2.4%  | 1.1%  | 0.441 | 0.198 | 0.100 | 0.126 | 1.7%  | 0.8%  | 0.738 | 0.171 | 0.087 | 0.142 |
| Insurance At/Prior to Second Line Start (% Reporting) |       |       |       |       |       |       |       |       |       |       |       |       |
| Commercial Insurance                                  | 33.3% | 33.2% | 1.000 | 0.623 | 0.002 | 0.045 | 42.1% | 37.1% | 0.394 | 0.743 | 0.101 | 0.036 |
| Medicaid                                              | 2.0%  | 2.1%  | 1.000 | 0.350 | 0.012 | 0.093 | 3.8%  | 1.5%  | 0.341 | 0.175 | 0.142 | 0.162 |
| Medicare                                              | 22.2% | 21.4% | 0.891 | 0.668 | 0.021 | 0.038 | 24.1% | 23.5% | 0.982 | 0.928 | 0.015 | 0.010 |
| Other Government Program                              | 3.7%  | 2.7%  | 0.654 | 0.951 | 0.060 | 0.005 | 4.8%  | 5.3%  | 1.000 | 0.981 | 0.022 | 0.003 |
| Other Payer                                           | 28.5% | 20.9% | 0.052 | 0.280 | 0.179 | 0.099 | 19.0% | 26.5% | 0.104 | 0.226 | 0.180 | 0.133 |
| Patient Assistance Program                            | 7.9%  | 11.2% | 0.217 | 0.308 | 0.114 | 0.089 | 4.1%  | 7.6%  | 0.216 | 0.636 | 0.146 | 0.055 |
| Missing                                               | 13.4% | 18.2% | 0.143 | 0.250 | 0.132 | 0.101 | 12.8% | 9.8%  | 0.487 | 0.386 | 0.092 | 0.098 |

**Supplementary Table 3.** Subgroup analyses comparing 2L Docetaxel vs. 2L NHT, separately by 1L Abiraterone and 1L Enzalutamide. The sample size and proportion of the total study size are reported; some proportions add to less than 100% when the variable has missing values. Hazard Ratios (HRs) HRs, 95% confidence intervals, and p-values are presented from Cox proportional hazards models adjusted for confounding via propensity-score weighting.

| Subgroup                      | 1L Abiraterone (HRs for 2L Docetaxel vs. 2L Enzalutamide) |                   |           |                   |        | 1L Enzalutamide (HRs for 2L Docetaxel vs. 2L Abiraterone) |                   |           |                   |        |
|-------------------------------|-----------------------------------------------------------|-------------------|-----------|-------------------|--------|-----------------------------------------------------------|-------------------|-----------|-------------------|--------|
|                               | N                                                         | HR (TTTTD)        | p (TTTTD) | HR (OS)           | p (OS) | N                                                         | HR (TTTTD)        | p (TTTTD) | HR (OS)           | p (OS) |
| Overall                       | 695 (100.0%)                                              | 1.26 (1.04, 1.53) | 0.018     | 1.32 (1.07, 1.63) | 0.010  | 422 (100.0%)                                              | 1.37 (1.10, 1.72) | 0.006     | 1.42 (1.10, 1.82) | 0.006  |
| Age ≤ 70 years                | 172 (24.7%)                                               | 1.27 (0.90, 1.78) | 0.169     | 1.93 (1.28, 2.91) | 0.002  | 101 (23.9%)                                               | 1.13 (0.72, 1.78) | 0.582     | 1.68 (0.98, 2.88) | 0.058  |
| Age > 70 years and ≤ 75 years | 142 (20.4%)                                               | 1.01 (0.66, 1.55) | 0.954     | 1.15 (0.72, 1.84) | 0.549  | 79 (18.7%)                                                | 1.61 (1.01, 2.57) | 0.043     | 1.82 (1.04, 3.19) | 0.036  |
| Age > 75 years and ≤ 80 years | 147 (21.2%)                                               | 1.60 (1.08, 2.39) | 0.020     | 1.19 (0.75, 1.88) | 0.470  | 66 (15.6%)                                                | 1.24 (0.71, 2.17) | 0.454     | 1.49 (0.83, 2.67) | 0.186  |
| Age > 80 years                | 234 (33.7%)                                               | 1.36 (0.92, 1.99) | 0.120     | 1.32 (0.87, 2.00) | 0.186  | 176 (41.7%)                                               | 1.63 (1.12, 2.37) | 0.011     | 1.33 (0.86, 2.05) | 0.206  |
| Initial Gleason ≤ 7           | 187 (26.9%)                                               | 1.34 (0.97, 1.85) | 0.080     | 1.56 (1.06, 2.30) | 0.025  | 105 (24.9%)                                               | 1.72 (1.14, 2.58) | 0.010     | 1.70 (1.05, 2.75) | 0.030  |
| Initial Gleason > 7           | 321 (46.2%)                                               | 1.55 (1.16, 2.09) | 0.004     | 1.52 (1.11, 2.07) | 0.009  | 199 (47.2%)                                               | 1.26 (0.90, 1.78) | 0.182     | 1.36 (0.94, 1.96) | 0.101  |
| 1L NHT < 6 months             | 299 (43.0%)                                               | 1.52 (1.18, 1.95) | 0.001     | 1.49 (1.12, 1.99) | 0.007  | 161 (38.2%)                                               | 1.34 (0.95, 1.88) | 0.094     | 1.29 (0.88, 1.89) | 0.185  |
| 1L NHT ≥ 6 months             | 396 (57.0%)                                               | 1.03 (0.77, 1.39) | 0.839     | 1.19 (0.86, 1.64) | 0.305  | 261 (61.8%)                                               | 1.33 (0.98, 1.80) | 0.069     | 1.43 (1.01, 2.02) | 0.044  |
| 1L NHT < 12 months            | 526 (75.7%)                                               | 1.38 (1.13, 1.69) | 0.002     | 1.44 (1.14, 1.81) | 0.002  | 291 (69.0%)                                               | 1.46 (1.12, 1.91) | 0.005     | 1.25 (0.94, 1.67) | 0.120  |
| 1L NHT ≥ 12 months            | 169 (24.3%)                                               | 0.70 (0.38, 1.29) | 0.249     | 0.82 (0.43, 1.56) | 0.547  | 131 (31.0%)                                               | 1.03 (0.67, 1.60) | 0.885     | 1.40 (0.79, 2.48) | 0.245  |
| pre-2L ECOG 0-1               | 334 (48.1%)                                               | 1.26 (0.96, 1.67) | 0.100     | 1.57 (1.14, 2.16) | 0.006  | 233 (55.2%)                                               | 1.45 (1.07, 1.96) | 0.016     | 1.70 (1.20, 2.42) | 0.003  |
| pre-2L ECOG 2-4               | 109 (15.7%)                                               | 2.20 (1.39, 3.48) | 0.001     | 1.40 (0.85, 2.30) | 0.183  | 68 (16.1%)                                                | 1.31 (0.76, 2.25) | 0.326     | 1.15 (0.64, 2.05) | 0.645  |
| < Median pre-2L ALP           | 278 (40.0%)                                               | 1.35 (0.95, 1.94) | 0.098     | 1.42 (0.96, 2.10) | 0.079  | 200 (47.4%)                                               | 1.53 (1.09, 2.16) | 0.015     | 1.64 (1.12, 2.40) | 0.012  |
| ≥ Median pre-2L ALP           | 316 (45.5%)                                               | 1.17 (0.92, 1.50) | 0.198     | 1.27 (0.98, 1.66) | 0.072  | 165 (39.1%)                                               | 1.22 (0.86, 1.72) | 0.257     | 1.16 (0.80, 1.66) | 0.434  |
| Below Median pre-2L PSA       | 273 (39.3%)                                               | 1.30 (0.91, 1.84) | 0.150     | 1.87 (1.25, 2.79) | 0.002  | 179 (42.4%)                                               | 1.68 (1.12, 2.51) | 0.012     | 1.24 (0.80, 1.92) | 0.338  |
| ≥ Median pre-2L PSA           | 301 (43.3%)                                               | 1.19 (0.92, 1.55) | 0.183     | 1.07 (0.81, 1.42) | 0.618  | 151 (35.8%)                                               | 0.93 (0.65, 1.32) | 0.681     | 0.92 (0.62, 1.38) | 0.697  |
| Below Median pre-2L LDH       | 53 (7.6%)                                                 | 1.02 (0.55, 1.88) | 0.949     | 0.83 (0.37, 1.89) | 0.666  | 40 (9.5%)                                                 | 1.36 (0.58, 3.17) | 0.482     | 1.34 (0.49, 3.64) | 0.567  |
| ≥ Median pre-2L LDH           | 61 (8.8%)                                                 | 1.31 (0.77, 2.23) | 0.321     | 1.51 (0.86, 2.65) | 0.154  | 32 (7.6%)                                                 | 1.38 (0.63, 3.00) | 0.420     | 1.65 (0.80, 3.41) | 0.177  |
| Below Median pre-2L Hemo      | 280 (40.3%)                                               | 1.21 (0.93, 1.57) | 0.153     | 1.20 (0.90, 1.61) | 0.210  | 179 (42.4%)                                               | 1.32 (0.95, 1.85) | 0.101     | 1.29 (0.90, 1.85) | 0.164  |
| ≥ Median pre-2L Hemo          | 325 (46.8%)                                               | 1.36 (0.99, 1.86) | 0.056     | 1.50 (1.06, 2.11) | 0.022  | 186 (44.1%)                                               | 1.54 (1.08, 2.19) | 0.016     | 1.57 (1.06, 2.32) | 0.024  |

**Supplementary Table 4.** Comparison of patient characteristics after initiation of second line (2L) treatment. Presented are the number of docetaxel administrations among patients taking 2L docetaxel; ECOG measurements available at least 4 months after 2L start and before 2L end; and summary statistics of treatment in third line and beyond. Also presented are p-values from t-tests comparing the 2L treatment groups.

| Characteristic                                                  | 1L Abiraterone  |              |       | 1L Enzalutamide |              |       |
|-----------------------------------------------------------------|-----------------|--------------|-------|-----------------|--------------|-------|
|                                                                 | 2L Enzalutamide | 2L Docetaxel | p     | 2L Abiraterone  | 2L Docetaxel | p     |
| N                                                               | 508             | 187          |       | 290             | 132          |       |
| Number of 2L Docetaxel Administrations (Median [Q1, Q3])        |                 | 6 (3.5, 9)   |       |                 | 6 (3, 8)     |       |
| ECOG (4 Months After 2L Start - End of 2L)                      |                 |              |       |                 |              |       |
| N Available (%)                                                 | 203 (40.0%)     | 67 (35.8%)   |       | 111 (38.3%)     | 50 (37.9%)   |       |
| Mean ± SD                                                       | 1.15 ± 0.84     | 0.99 ± 0.75  | 0.161 | 1.07 ± 0.82     | 1.14 ± 0.86  | 0.631 |
| Treatment Post-2L                                               |                 |              |       |                 |              |       |
| Any Third Line Therapy Observed                                 | 259 (51.0%)     | 93 (49.7%)   |       | 123 (42.4%)     | 76 (57.6%)   |       |
| Total Post-2L Lines of Therapy: Mean ± SD                       | 0.91 ± 1.12     | 0.86 ± 1.14  | 0.605 | 0.76 ± 1.13     | 0.96 ± 1.16  | 0.095 |
| Post-2L Lines of Therapy Including Any Approved Drug: Mean ± SD | 0.81 ± 1.00     | 0.74 ± 0.98  | 0.415 | 0.67 ± 0.99     | 0.79 ± 0.87  | 0.236 |
| Unique Post-2L Approve Drugs: Mean ± SD                         | 0.85 ± 1.05     | 0.78 ± 1.02  | 0.421 | 0.70 ± 1.02     | 0.79 ± 0.86  | 0.407 |

**Supplementary Table 5.** Selected studies evaluating effectiveness of alternate novel hormonal therapies (NHT; abiraterone (A) or enzalutamide (E)) or docetaxel (D) after progression on an NHT (E or A)

| Author                                           | Sample size (n) | Patient population                                                       | PSA <sub>50</sub> response rate (%)                      | Median PFS per PCWG2 criteria in months                 | Median OS from first NHT                                  | PMID     |
|--------------------------------------------------|-----------------|--------------------------------------------------------------------------|----------------------------------------------------------|---------------------------------------------------------|-----------------------------------------------------------|----------|
| NHT after progression on NHT                     |                 |                                                                          |                                                          |                                                         |                                                           |          |
| Suzman et al                                     | 30              | Enzalutamide after progression on abiraterone, docetaxel naïve           | 34                                                       | 4.7                                                     | Not reported                                              | 25053178 |
| Maughan et al                                    | 65              | Alternate NHT (A or E) after progression on NHT, prior docetaxel allowed | 37 (A→E) and 13 (E→A)                                    |                                                         | 33.3 (A→E) and 29.9 (E→A)                                 | 27527643 |
| de Bono et al                                    | 214             | E after progression on ≥24 weeks of A, prior docetaxel allowed           | 27                                                       | 5.7                                                     | Not reached                                               | 28844372 |
| Matsubara et al                                  | 97              | Alternate NHT (A or E) after progression on NHT, chemo naïve             | 30 (A→E) and 6.4 (E→A)                                   | 3.4 (A→E) and 2.9 (E→A) months                          | 25.4 (A→E) and 24.2 (E→A) months                          | 29042308 |
| Azad et al                                       | 115             | E after A, prior docetaxel allowed (n=68)                                | 23.5 (22% in prior docetaxel and 25% in docetaxel naïve) | 5.3 (4.6 in prior docetaxel and 6.6 in docetaxel naïve) | 10.6 (10.6 in prior docetaxel and 8.6 in docetaxel naïve) | 28314611 |
| Khalaf et al                                     | 202             | 101 (A→E) and 101 (E→A), prior docetaxel allowed                         | NR                                                       | 2.7 (A→E) and 1.7 (E→A)                                 | NR                                                        | 31727538 |
| Docetaxel after progression on NHT (abiraterone) |                 |                                                                          |                                                          |                                                         |                                                           |          |
| Suzman et al                                     | 31              | Docetaxel after progression on abiraterone                               | 40                                                       | 4.4                                                     | NR                                                        | 25053178 |
| de Bono et al                                    | 261             |                                                                          | 40 (100 patients with PSA values)                        | 3 (Median duration)                                     | NR                                                        |          |
| Schweizer et al                                  | 24              |                                                                          | 38                                                       | 4.4                                                     | NR                                                        | 24491307 |
| Azad et al                                       | 37              |                                                                          | 32                                                       | NR                                                      | NR                                                        | 25175831 |
| Mezynski et al                                   | 35              |                                                                          | 26                                                       | NR                                                      | 12.5 months from start of docetaxel                       | 22771826 |

**Propensity Score Evaluation:** Covariate balance was assessed by examining p-values for weighted versions of the tests in Supplementary Table 2 (Wilcoxon rank-sum tests and chi-squared tests), and by examining the weighted standardized mean differences (SMDs). Among 1L abiraterone patients, the standardized mean differences (SMD) were below 0.20 for all variables, a typical threshold used to indicate reasonable covariate balance. The variables with statistically significant differences even after PS-weighting were age at 2L start and time on 1L therapy; these were investigated in subgroup analyses. Among 1L enzalutamide patients, the only variable above the 0.20 threshold was the frequency of ECOG 3-4 patients; there were very few of these patients, so this likely does not impact our results, though the results should be interpreted cautiously when applied to such patients. Smoothed histograms of the propensity score distributions (Supplementary Figure 1) show they are highly overlapping. We also calculated the area under the receiver-operator characteristic curve (AUC) for evaluating how well the propensity score predicted the observed treatment; among 1L abiraterone patients, this AUC was 0.71 (95% CI 0.67-0.75); among 1L enzalutamide patients, the AUC was 0.68 (95% CI 0.63-0.74).

**Supplementary Figure 1.** Smoothed histograms of propensity scores. Propensity scores model the probability of treatment with 2L Docetaxel vs. 2L Alternate NHT, and are presented for both 2L groups for the 1L Abiraterone patients (Supplementary Figure 1a) and 1L Enzalutamide patients (Supplementary Figure 1b).

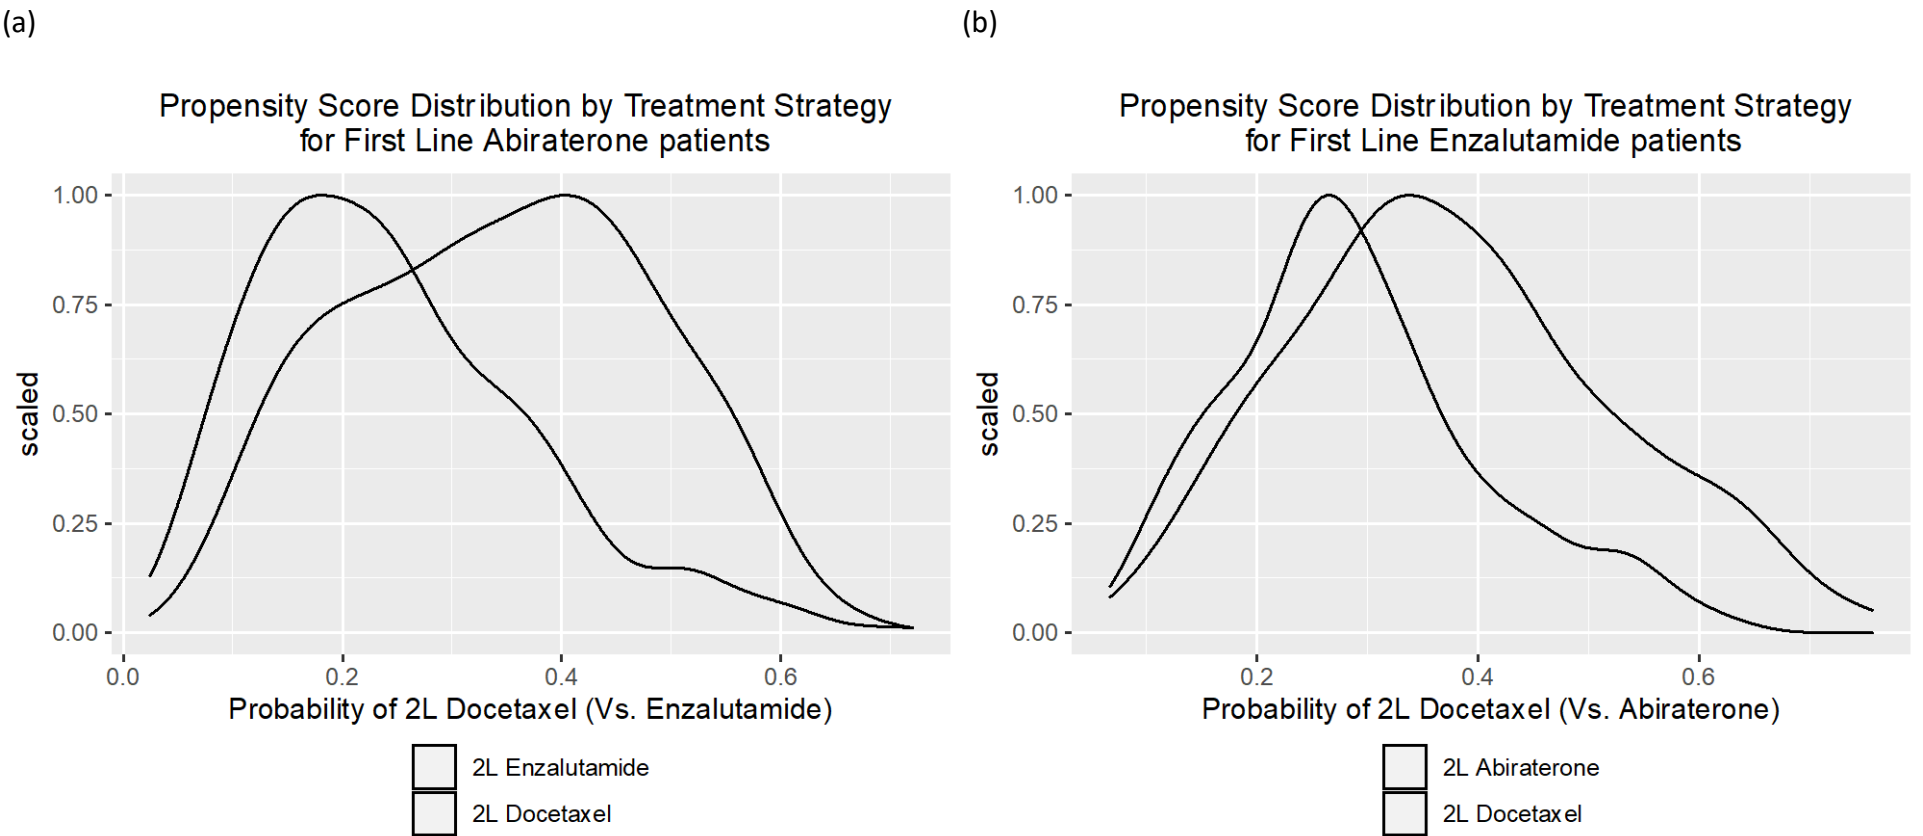

Supplement: s1 [file s1]
